# Supplementary material for: Mechanistic Insights into Hydrodeoxygenation of Acetone over Mo/HZSM-5 Bifunctional Catalyst for the Production of Hydrocarbons
Source: MDPI journal article supplement (doi:10.3390/en15010053), 2021-12-22
Supplement: s1 [file s1]

## **Supporting Information**

### **Mechanistic insights into hydrodeoxygenation of acetone over Mo/HZSM-5 bifunctional catalyst for the production of hydrocarbons**

Kai Miao <sup>a</sup>, Tan Li <sup>a</sup>, Zhigang Zhao <sup>a</sup>, Jing Su <sup>a</sup>, Cong Wang <sup>a</sup>, Kaige Wang <sup>a,\*</sup>

<sup>a</sup> State Key Laboratory of Clean Energy Utilization, Zhejiang University, Hangzhou 310027, China

\* Corresponding authors. E-mail address: kaigewang@zju.edu.cn

#### Detailed description of GC system

GC (Agilent 8860) with a FID (Flame ion detector) and a TCD (Thermal conductivity detector) detector was applied to the online analysis. The split ratio of the GC inlet is 20:1. A DB-1701 capillary columns were used to separate C5+ condensable liquid products. The DB-1701 column (60 m, 0.250  $\mu$ m, 0.250  $\mu$ m) was connected to a flame ionization detector (FID) for product quantification by calibration with external standards. A total of 30 chemical substances are calibrated by the external standard method. A GS-GasPro column (60 m, 0.320 mm) was connected to a thermal conductivity detector (TCD) to measure non-condensable gas (NCG) products (CO, CO<sub>2</sub>, C1-C4 hydrocarbons). A standard gas mixture consisting of these NCG compounds was used to calibrate the yield of NCG.

For each run, the GC oven was programmed for a 8 min hold at 30 °C then ramped at 6 °C/min to 150 °C, followed by ramped at 10 °C/min to 250 °C, after which temperature was held constant for 10 min.

**Table S1.** Summary of detailed calibration coefficient.

| Compounds                      | Calibration    | R <sup>2</sup> |
|--------------------------------|----------------|----------------|
| <b>Atmosphere</b>              | H <sub>2</sub> |                |
| <i>Vapors</i>                  |                |                |
| Hexene                         | 20568463       | 0.99           |
| Benzene                        | 16085882       | 0.99           |
| Toluene                        | 16533299       | 0.99           |
| Xylene                         | 16892825       | 0.99           |
| Mesitylene                     | 17584758       | 0.99           |
| Propylbenzene e                | 18646125       | 0.99           |
| Diethylbenzene                 | 19883564       | 0.99           |
| Indane                         | 18008583       | 0.99           |
| Indene                         | 17651304       | 0.99           |
| Naphthalene                    | 19292294       | 0.99           |
| Naphthalene, methyl-           | 19893623       | 0.99           |
| Naphthalene, dimethyl-         | 20295627       | 0.99           |
| Anthracene                     | 22567494       | 0.99           |
| <i>Gas</i>                     |                |                |
| Ar                             | 456834         | 0.99           |
| CO                             | 517683         | 0.99           |
| CO <sub>2</sub>                | 320698         | 0.99           |
| CH <sub>4</sub>                | 612597         | 0.99           |
| C <sub>2</sub> H <sub>6</sub>  | 320698         | 0.98           |
| C <sub>2</sub> H <sub>4</sub>  | 416924         | 0.99           |
| C <sub>3</sub> H <sub>8</sub>  | 320698         | 0.99           |
| C <sub>3</sub> H <sub>6</sub>  | 457757         | 0.99           |
| C <sub>4</sub> H <sub>10</sub> | 359398         | 0.99           |
| C <sub>4</sub> H <sub>8</sub>  | 374328         | 0.99           |

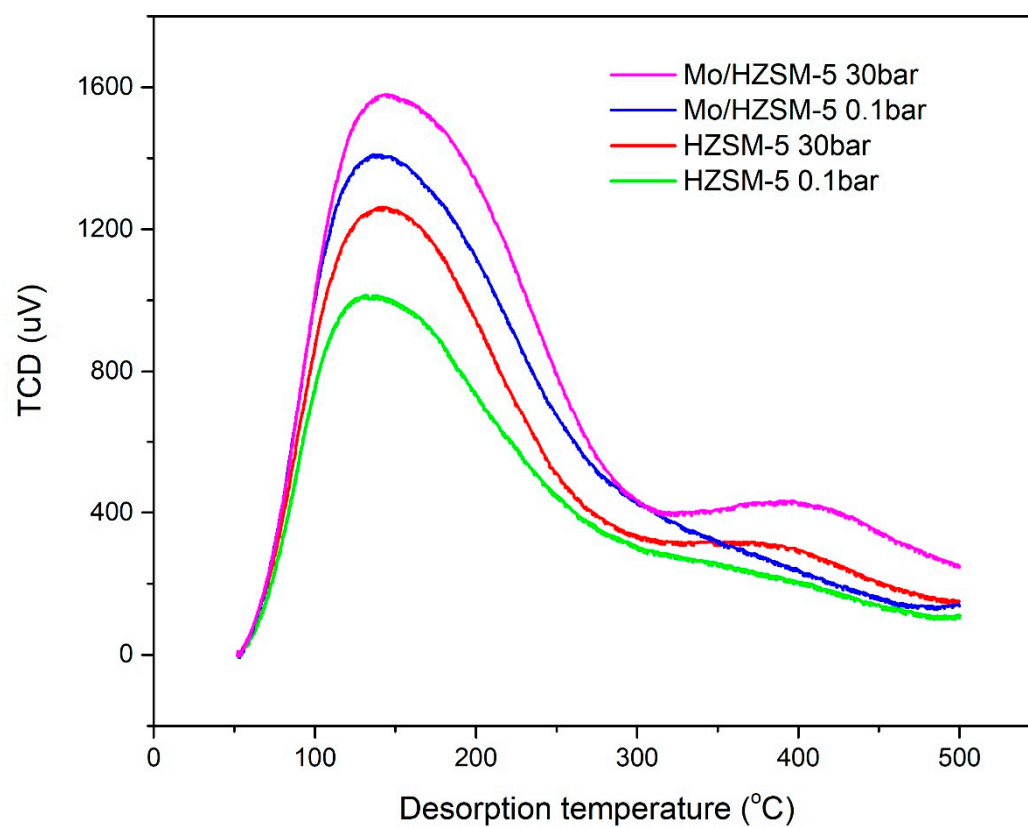

Figure S1. The results of NH<sub>3</sub>-TPD for spent catalysts.
